# Supplementary material for: Highly selective and sensitive fluorescent “TURN-ON” furan-based Schiff base for zinc(ii) ion probing: chemical synthesis, DFT studies, and X-ray crystal structure
Source: Royal Society of Chemistry journal article supplement (doi:10.1039/d3nj02466k), 2023-01-01
Supplement: d3nj02466k1.pdf [file d3nj02466k1.pdf]

## Highly Selective and Sensitive Fluorescent "TURN-ON" Furan-based Schiff Base for Zinc(II) Ion Probing: Chemical Synthesis, DFT Studies, and X-ray Crystal Structure

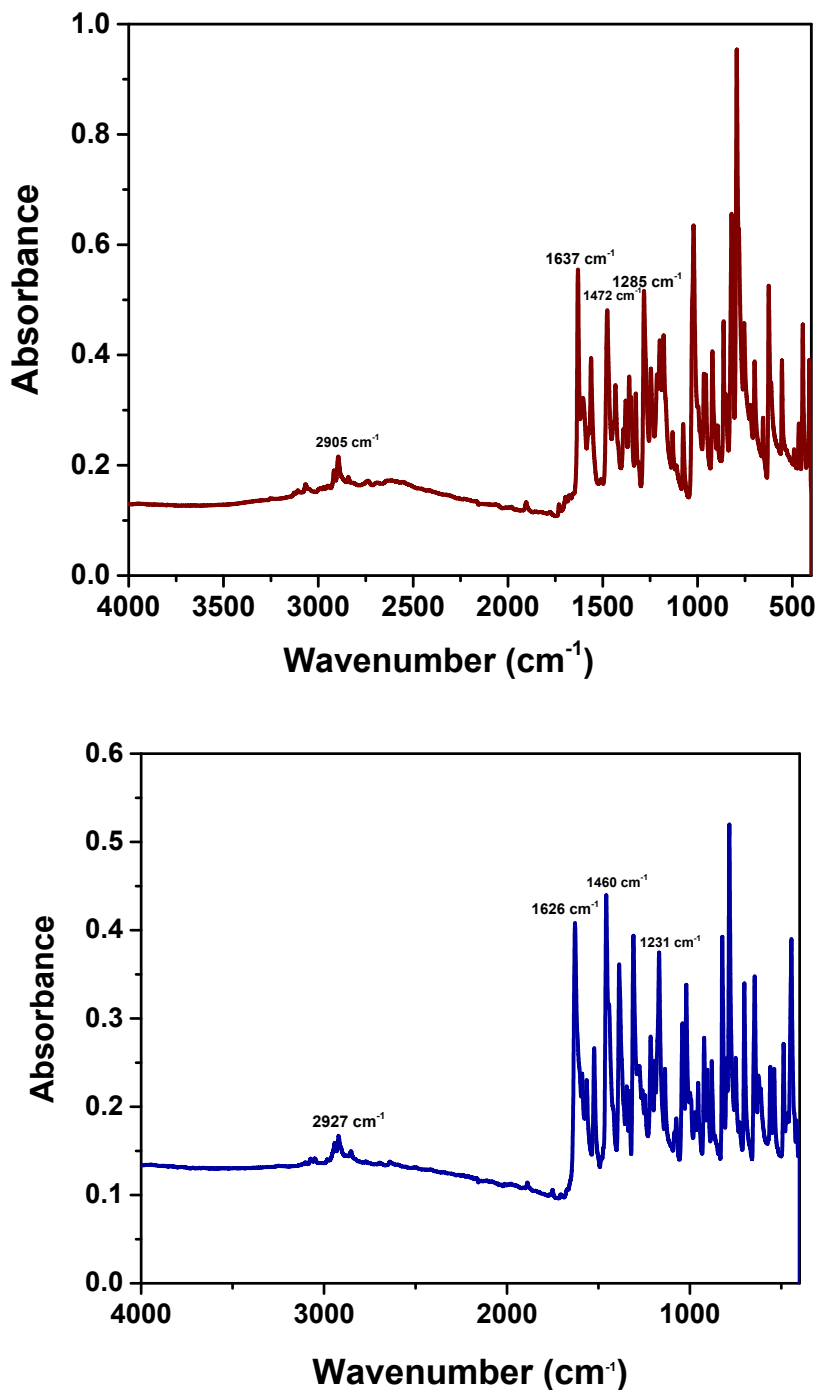

Figure S1: ATR-IR spectrum of BFMP (top) and BFMP-Zn<sup>2+</sup> complex (bottom).

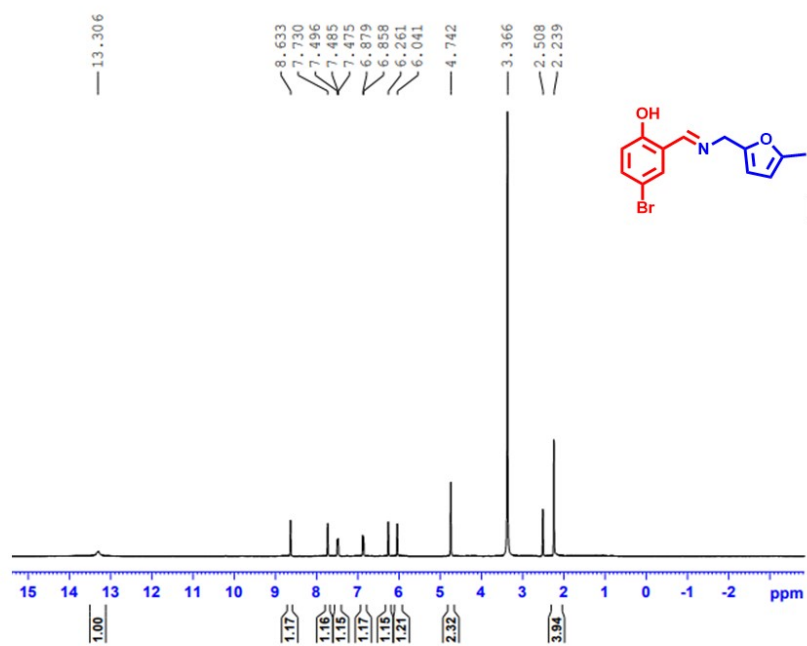

Figure S2: <sup>1</sup>H NMR spectrum of BFMP.

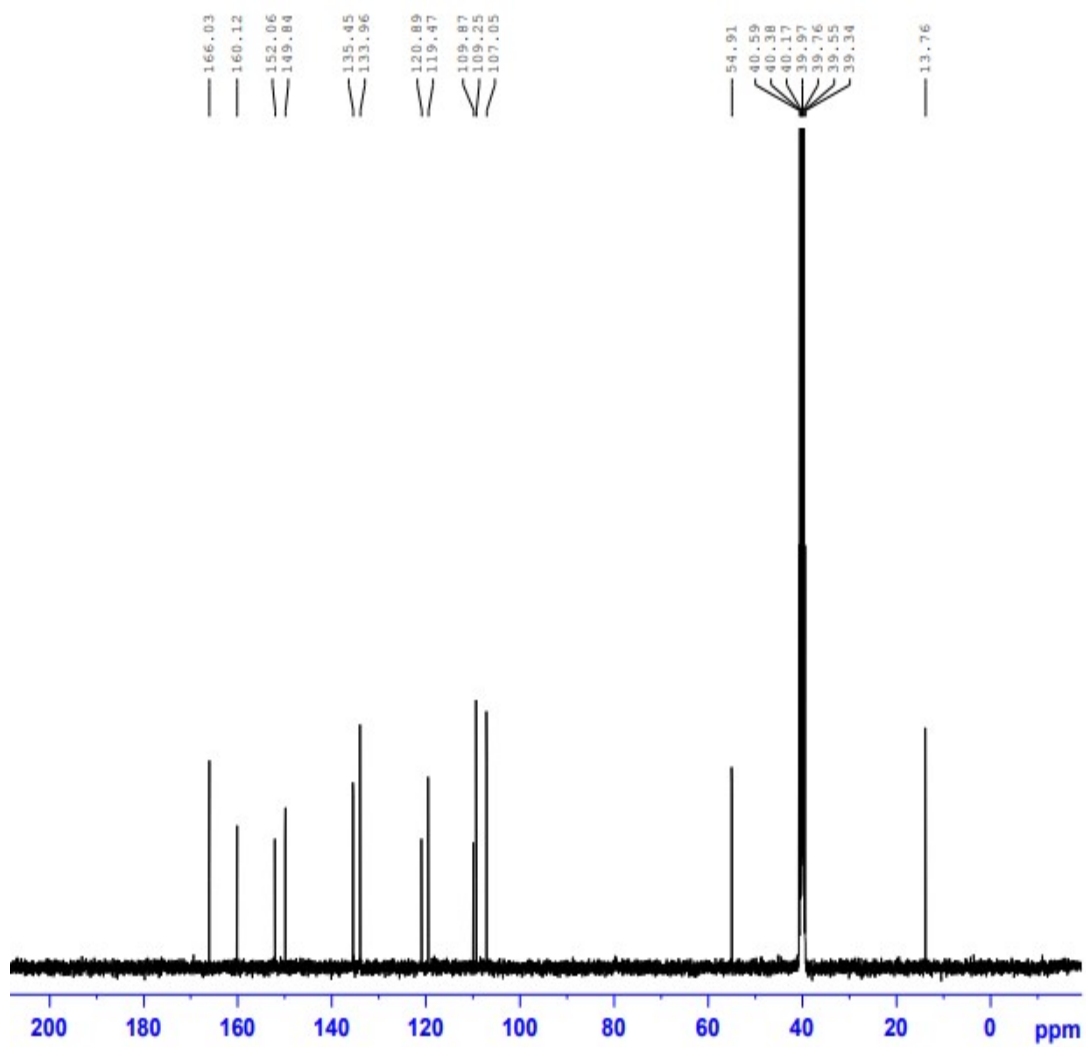

Figure S3:  $^{13}\text{C}$  NMR spectrum of BFMP.

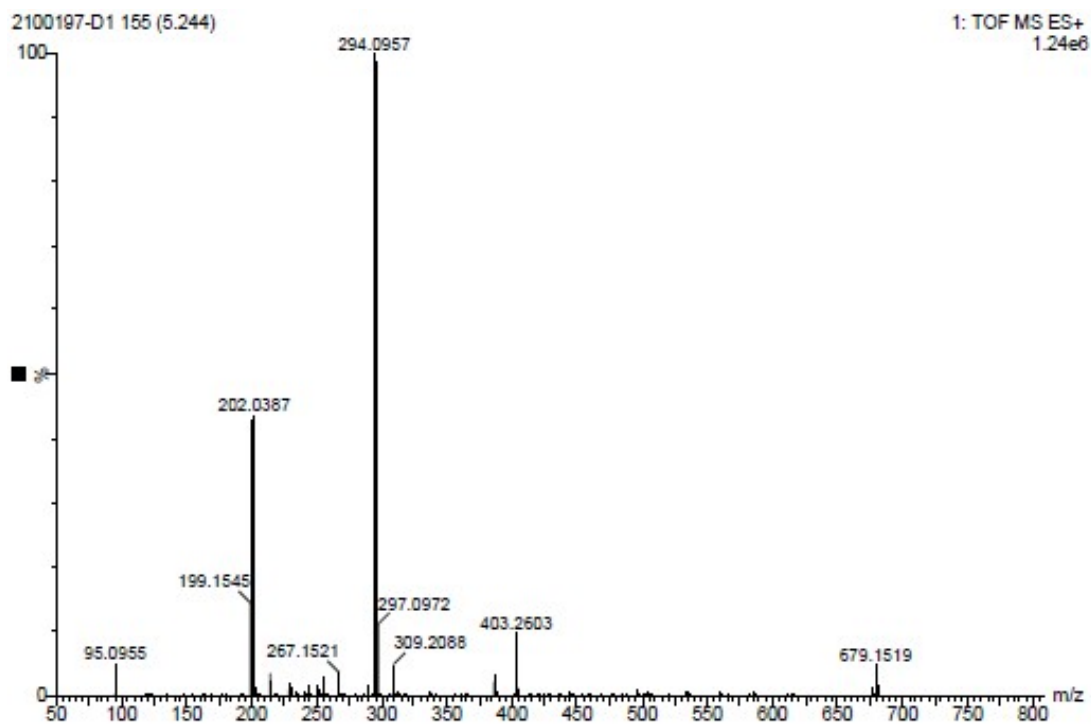

**Figure S4:** LCMS spectra of BFMP.

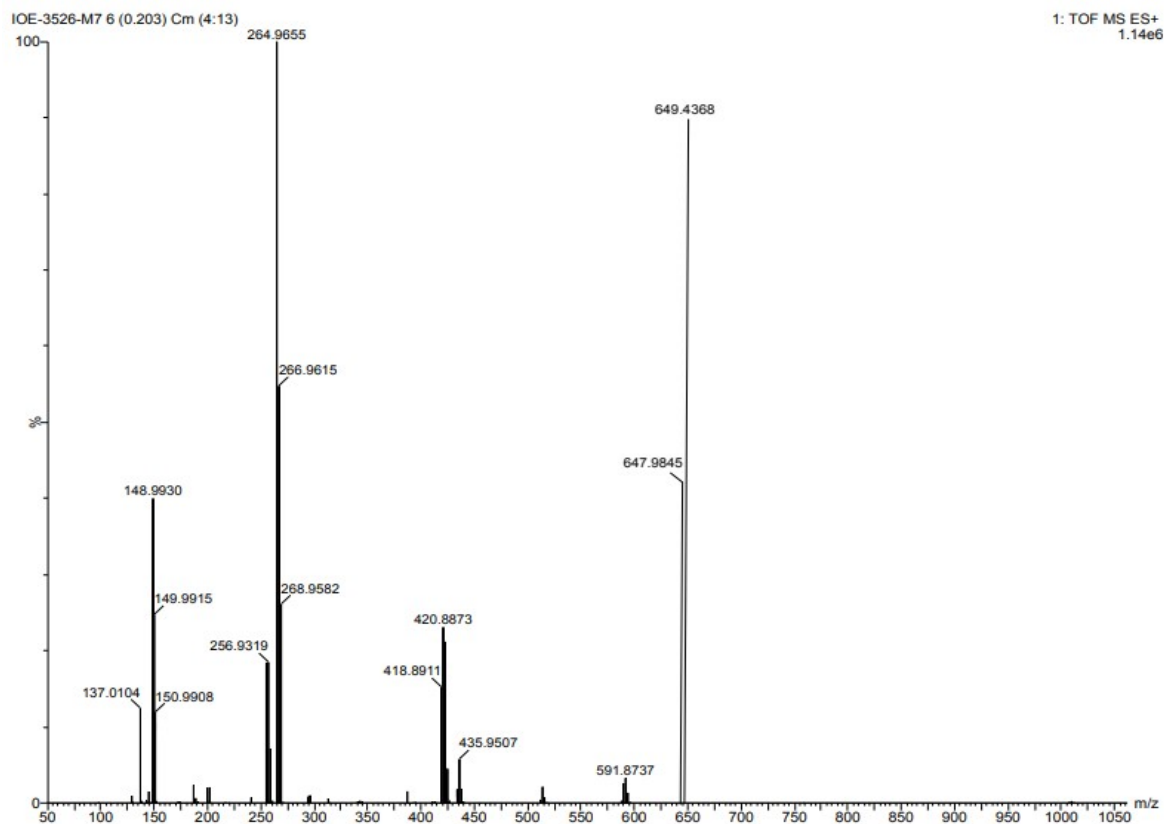

**Figure S5:** LCMS of zinc complex  $[\text{Zn}(\text{BFMP})_2]$ .

**Table S1:** Comparison some recently published fluorescent chemosensors for Zn<sup>2+</sup> ions.

| SI No. | Probe                                                                               | Excitation/Emission for Zn <sup>2+</sup> | Mechanism                                            | LOD                      | Reference |
|--------|-------------------------------------------------------------------------------------|------------------------------------------|------------------------------------------------------|--------------------------|-----------|
| 1      | 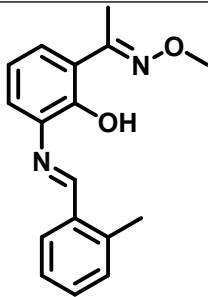   | 358/560                                  | combination of ICT and CHEF                          | $1.44 \times 10^{-7}$ M  | 1         |
| 2      |   | 419/558                                  | Excited State Intramolecular Proton Transfer (ESIPT) | $7.30 \times 10^{-8}$ M  | 2         |
| 3      |  | 353/530                                  | CHEF                                                 | $6.45 \times 10^{-8}$ M  | 3         |
| 4      |  | 315/520                                  | CHEF                                                 | $27.80 \times 10^{-9}$ M | 4         |

**References:**

1. Wen-Kui Dong, Sunday Folaranmi Akogun, Yang Zhang, Yin-Xia Sun, Xiu-Yan Dong, A reversible “turn-on” fluorescent sensor for selective detection of Zn<sup>2+</sup>, *Sensors and Actuators B: Chemical*, 238, 2017, 723-734.
2. Sutapa Sahu, Yeasin Sikdar, Riya Bag, Javier Cerezo, José P. Cerón-Carrasco and Sanchita Goswami, Turn on Fluorescence Sensing of Zn<sup>2+</sup> Based on Fused Isoindole-Imidazole Scaffold, *Molecules*, 27, 2022, 2859.
3. Fei Sun, Guanxin Zhang, Deqing Zhang, Lin Xue, Hua Jiang, Aqueous Fluorescence Turn-on Sensor for Zn<sup>2+</sup> with a Tetraphenylethylene Compound, *Organic Letters*, 13, 2011, 6378–6381
4. Somenath Lohar, Siddhartha Pal, Manjira Mukherjee, Abhishek Maji, Nicola Demitri and Pabitra Chattopadhyay, A turn-on green channel Zn<sup>2+</sup> sensor and the resulting zinc(II) complex as a red channel HPO<sub>4</sub><sup>2-</sup> ion sensor: a new approach, *RSC Advances*, 7, 2017, 25528-25534.
